# Supplementary material for: Photothermal synergy mechanism in near-infrared photopolymerization for 3D printing acceleration and mechanical enhancement
Source: Royal Society of Chemistry journal article supplement (doi:10.1039/d3tc03971d), 2024-01-01
Supplement: d3tc03971d1.pdf [file d3tc03971d1.pdf]

1 **Supporting Information**

2 **Photothermal synergy mechanism in near-infrared**  
3 **photopolymerization for 3D printing acceleration and mechanical**  
4 **enhancement**

5 *Wei Wu*<sup>a</sup>, *Hang Xu*<sup>a</sup>, *Jia-Tao Miao*<sup>a, b</sup>, *Xiucheng Zou*<sup>a, b, \*</sup>, *Ren Liu*<sup>a, b, \*</sup>

6 <sup>a</sup> Key Laboratory of Synthetic and Biological Colloids, Ministry of Education, School  
7 of Chemical and Material Engineering, Jiangnan University, 214122, Wuxi, Jiangsu,  
8 China.

9 <sup>b</sup> International Research Center for Photoresponsive Molecules and Materials, Jiangnan  
10 University, 214122, Wuxi, Jiangsu, China.

11 \* Corresponding authors.

12 E-mail address: [liuren@jiangnan.edu.cn](mailto:liuren@jiangnan.edu.cn)(R, Liu), [zouxiucheng@jiangnan.edu.cn](mailto:zouxiucheng@jiangnan.edu.cn)(X,  
13 Zou).

14 **1. Experimental Section**

15 1.1 Materials

16 1.2 Characterizations

17 1.3 Root mean square roughness

18 **2. Figures**

## 19 **1. Experimental Section**

### 20 **1.1 Materials**

21 Difunctional bisphenol-A epoxy acrylate oligomer (RY1101),  
22 tri(propyleneglycol)diacrylate (TPGDA), trimethylolpropane triacrylate (TMPTA)  
23 were purchased from Jiangsu Kailinruiyang Chemical Co., Ltd. (China). Ethoxylated  
24 bisphenol-A diacrylate (EM2261) was purchased from Eternal Synthetic Resins Co.,  
25 Ltd. (China). Phenyl bis(2,4,6-trimethylbenzoyl)-phosphine oxide (BAPO) was  
26 purchased from Gurun Technology Co., Ltd. (China), and UCPs (NaYF<sub>4</sub>: Yb, Tm. 81.5  
27 mol% Y, 18 mol% Yb, 0.5 mol% Tm) were purchased from Shanghai Ziqi Chemical  
28 Technology Co., Ltd. The thermal initiators azo diisobutyronitrile (ABVN), azo  
29 diisobutyronitrile (AIBN), p-benzoyl peroxide (BPO), and tert-butyl peroxybenzoate  
30 (TBPB) were supplied by Shanghai Adamas Reagent Co., Ltd. All reagents were used  
31 without further purification unless otherwise stated.

### 32 **1.2 Characterizations**

33 scanning electron microscope images were monitored with a Hitachi S-4800 SEM. UV-  
34 vis spectra were measured using a Beijing Purkinje TU-1901 UV-vis  
35 spectrophotometer. Real-time monitoring of temperature was performed using a Fluke  
36 Ti400 thermal imager. The dissociation temperatures of thermal initiators were  
37 measured using Mettler Q200 DSC. Tensile properties were measured by using a  
38 universal Instron 5967X Universal Testing Systems. Five specimens of each sample

39 were tested, and the averaged results were presented. The surfaces of the samples were  
40 observed using an upper light source with an ultra-depth of field VHX-1000C  
41 microscope, and digital photographs were taken. Raman spectra and mapping images  
42 of the sample surface were obtained using a 532 nm laser and a 20x objective on a  
43 DXR3xi (ThermoFisher, USA) confocal Raman microscope system. An area of 30  $\mu\text{m}$   
44  $\times$  200  $\mu\text{m}$  was scanned in 2  $\mu\text{m}$  steps to obtain 16  $\times$  100-pixel images. The equation for  
45 calculating the double bond conversion ratio is the same as that listed for the double  
46 bond conversion ratio. The viscosity of the uncured resin was measured with a HAAKE  
47 MARS60 rheometer equipped with Rheonaut annex (ThermoFisher), exhibiting a cone-  
48 and-plate geometry (50  $\mu\text{m}$  gap) with a 20 mm diameter and 2° angle. The temperature  
49 was controlled with the help of an integrated Peltier unit.

### 50 **1.3 Root mean square roughness**

51 Morphology investigations were performed on the surfaces of the cured samples using  
52 atomic force microscopy (AFM, MuLtimode 8). The image processing software  
53 (Nanoscope Analysis 3.0) was used to perform topography fitting and compute root-  
54 mean-square roughness ( $R_q$ ).  $R_q$  is defined as the standard deviation of Z values in a  
55 given region, which is calculated using the following formula:

$$56 \quad R_q = \sqrt{\frac{\sum (z_t - z_a)^2}{n}}$$

57

58 **2. Figures**

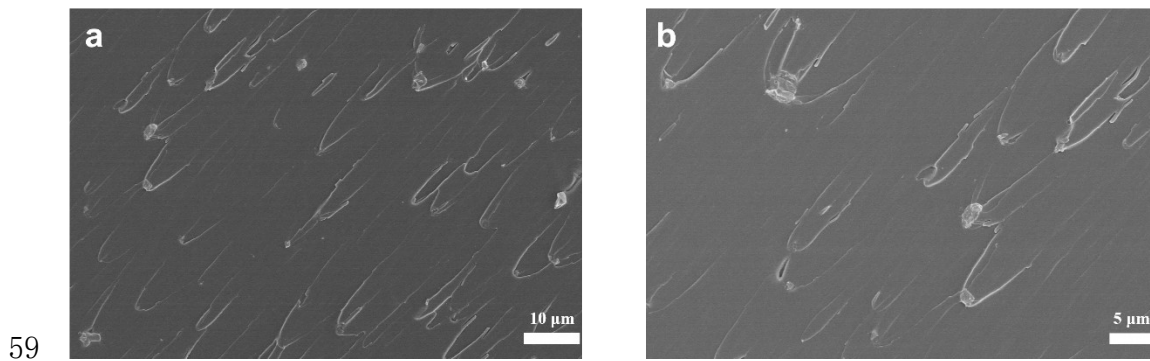

60 **Fig. S1.** SEM images of the cross-section of a tensile strip. Uniform distribution of  
61 UCPs was observed at all magnifications.

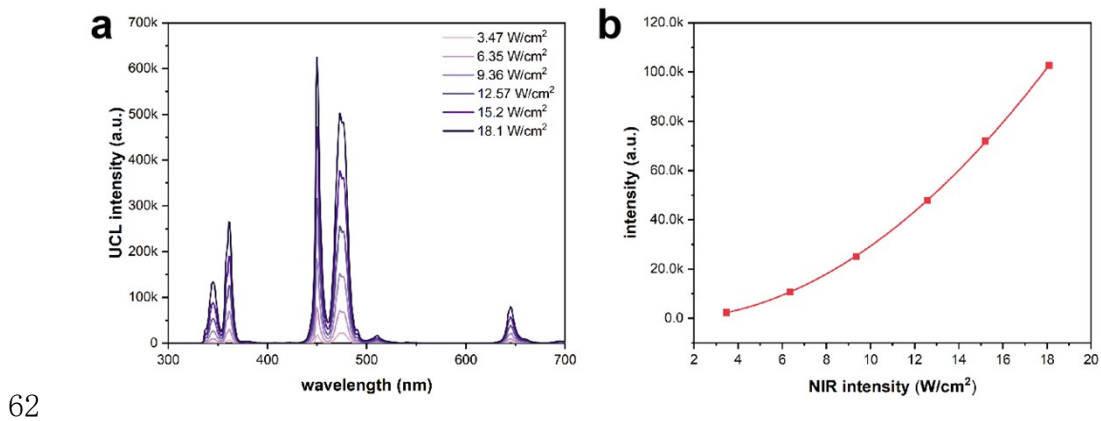

63 **Fig. S2.** (a) UCPs fluorescence emission spectra under different near-infrared light  
64 intensities. (b) Dependence of UCPs fluorescence intensity on excitation light intensity  
65 at 330-370 nm.

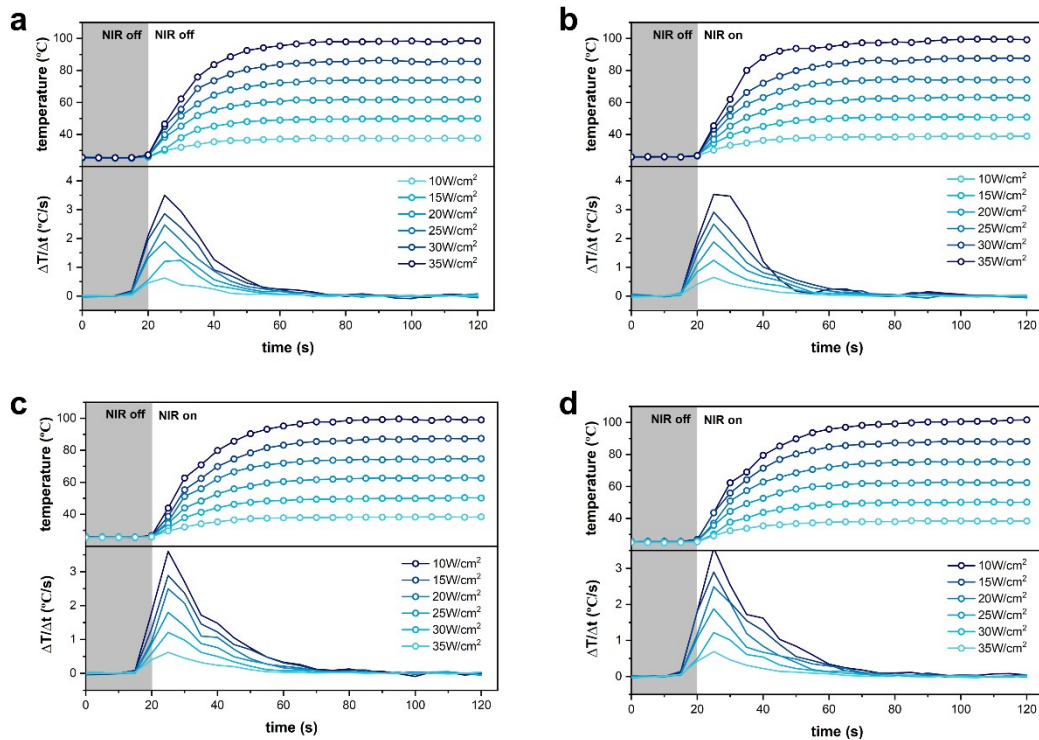

66

67 **Fig. S3.** Temperature-time curves and temperature rate-time curves of systems with (a)

68 0.25 wt.%, (b) 0.5 wt.%, (c) 1 wt.% and (d) 2 wt.% PIs. When only PIs is added, the

69 temperature and heating rate of the system do not change significantly with the increase

70 of PIs concentration.

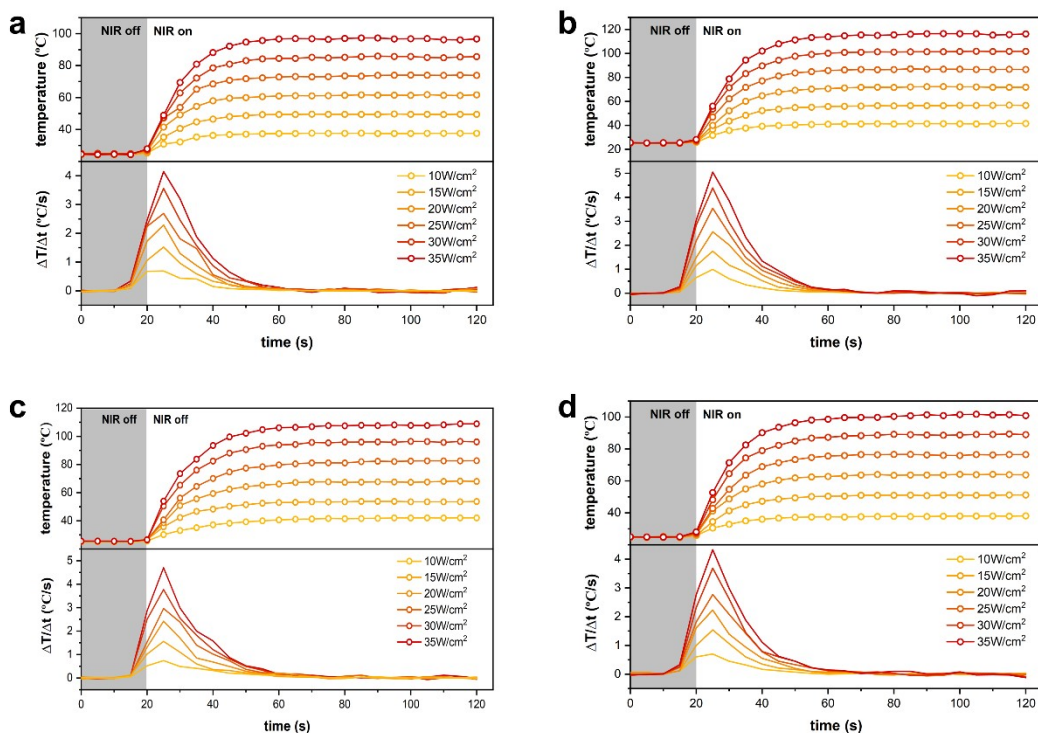

71

72 **Fig. S4.** Temperature-time curves and temperature rate-time curves of systems with (a)  
73 0.25 wt.%, (b) 0.5 wt.%, (c) 1 wt.% and (d) 2 wt.% UCPs. The increase of UCPs  
74 concentration significantly increases the temperature and heating rate of the system,  
75 indicating that the UCPs concentration is an important factor affecting the thermal  
76 effect of the system.

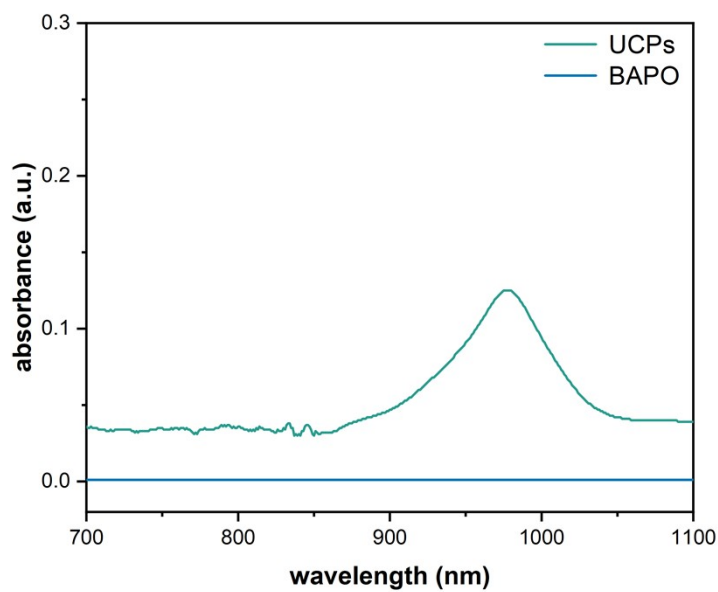

77

78 **Fig. S5.** The absorption spectra of UCPs and BAPO at 700 to 1100nm. As can be seen,  
79 there is a significant absorption at 980 nm for UCPs, but not for BAPO

80

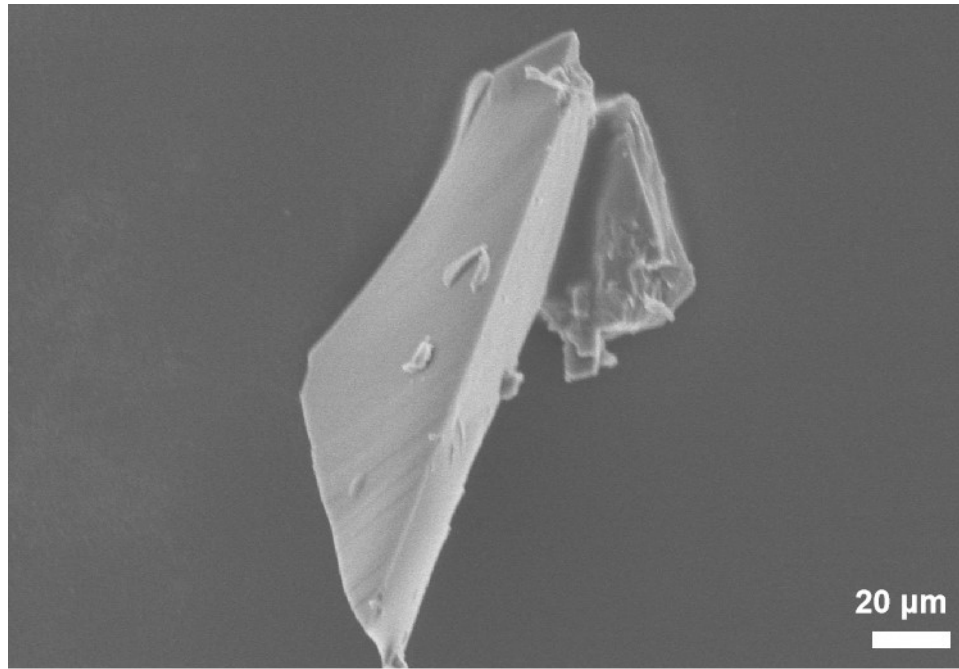

81 **Fig. S6.** The SEM images of UCPs with polymer appearing on the surface.

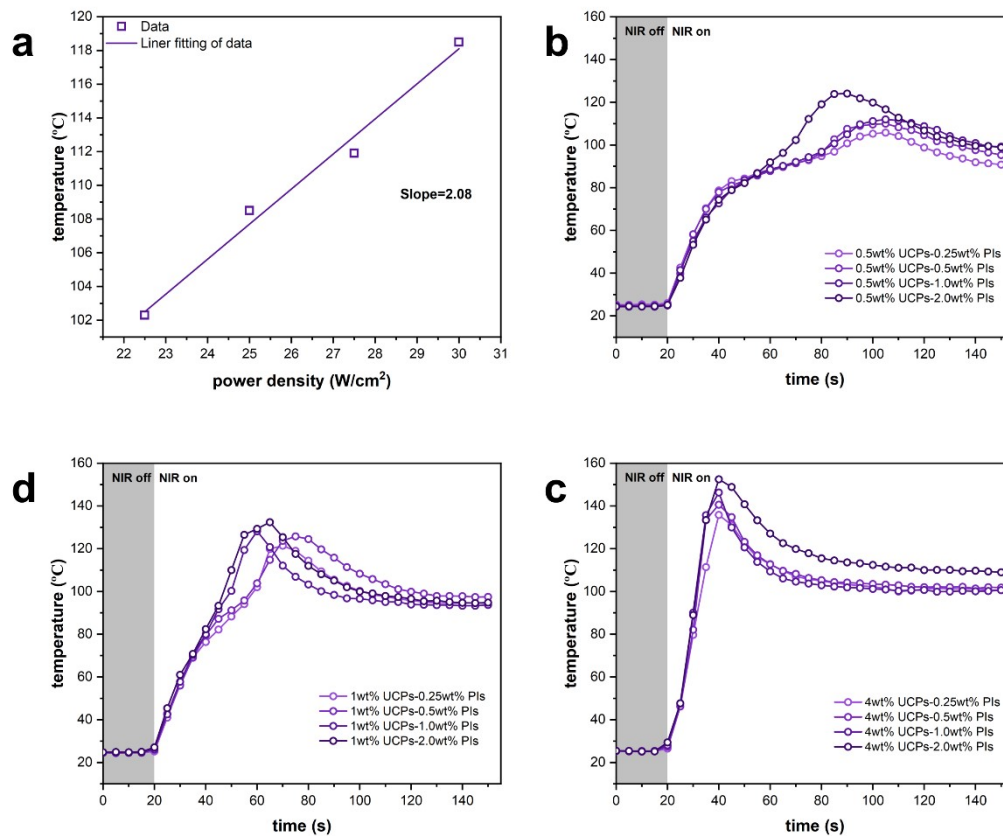

82

83 **Fig. S7.** (a)  $T_p$  as a function of power density of UCAP system containing 2 wt.% UCPs

84 and 0.5 wt.% PIs. Temperature-time curves of UCAP system containing different PIs

85 concentrations at (b) 0.5 wt.% UCPs, (c) 1 wt.% UCPs, (d) 4 wt.% UCPs. The power  
86 density of NIR laser is 30 W/cm<sup>2</sup>. When polymerization occurs, the T<sub>p</sub> of the system  
87 maintains a linear relationship with the laser power density, so the T<sub>p</sub> of the system can  
88 be adjusted by adjusting the power density. Increasing the concentration of UCPs and  
89 PIs increases the temperature of the system.

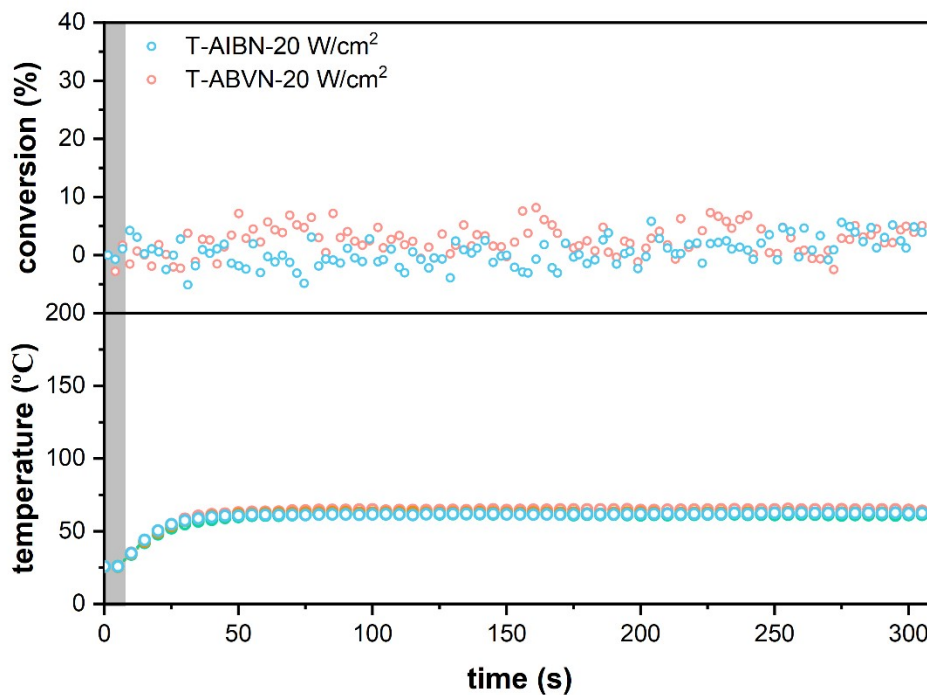

90

91 **Fig. S8.** Conversion-time curves and temperature-time curves of thermal curing system  
92 under the power density of 20 W/cm<sup>2</sup> (0.25 wt.% TIs). When the power density is low,  
93 there is no polymerization due to the absence of polymerization heat.



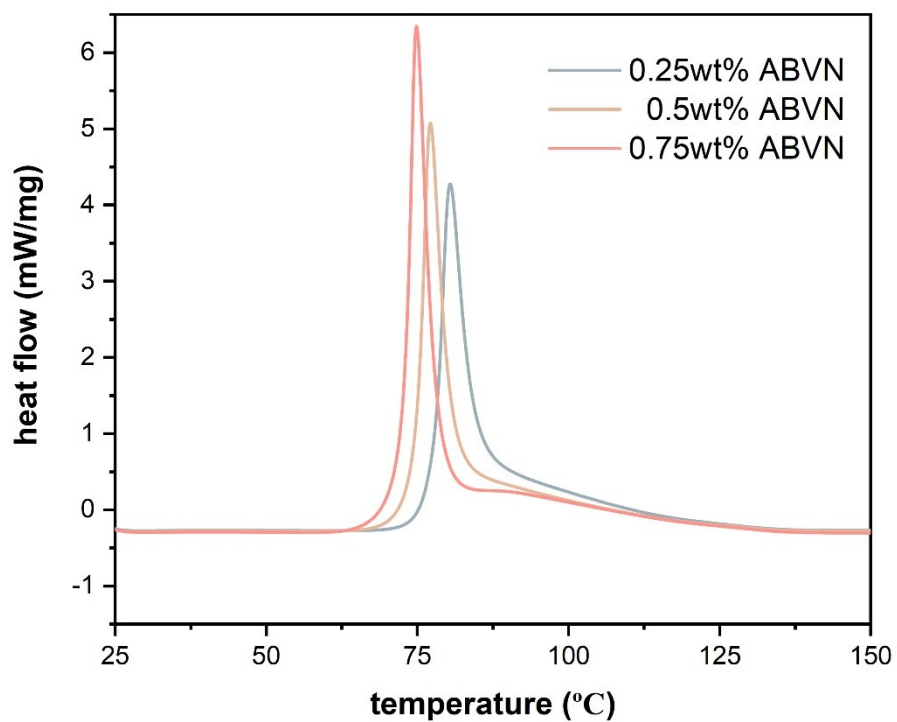

94

95 **Fig. S9.** DSC curves of different concentrations of ABVN with a temperature rise of  
96 10 K/min. With the increase of the concentration of thermal initiator,  $T_d$  decreased and  
97 the polymerization rate of thermal polymerization increased.

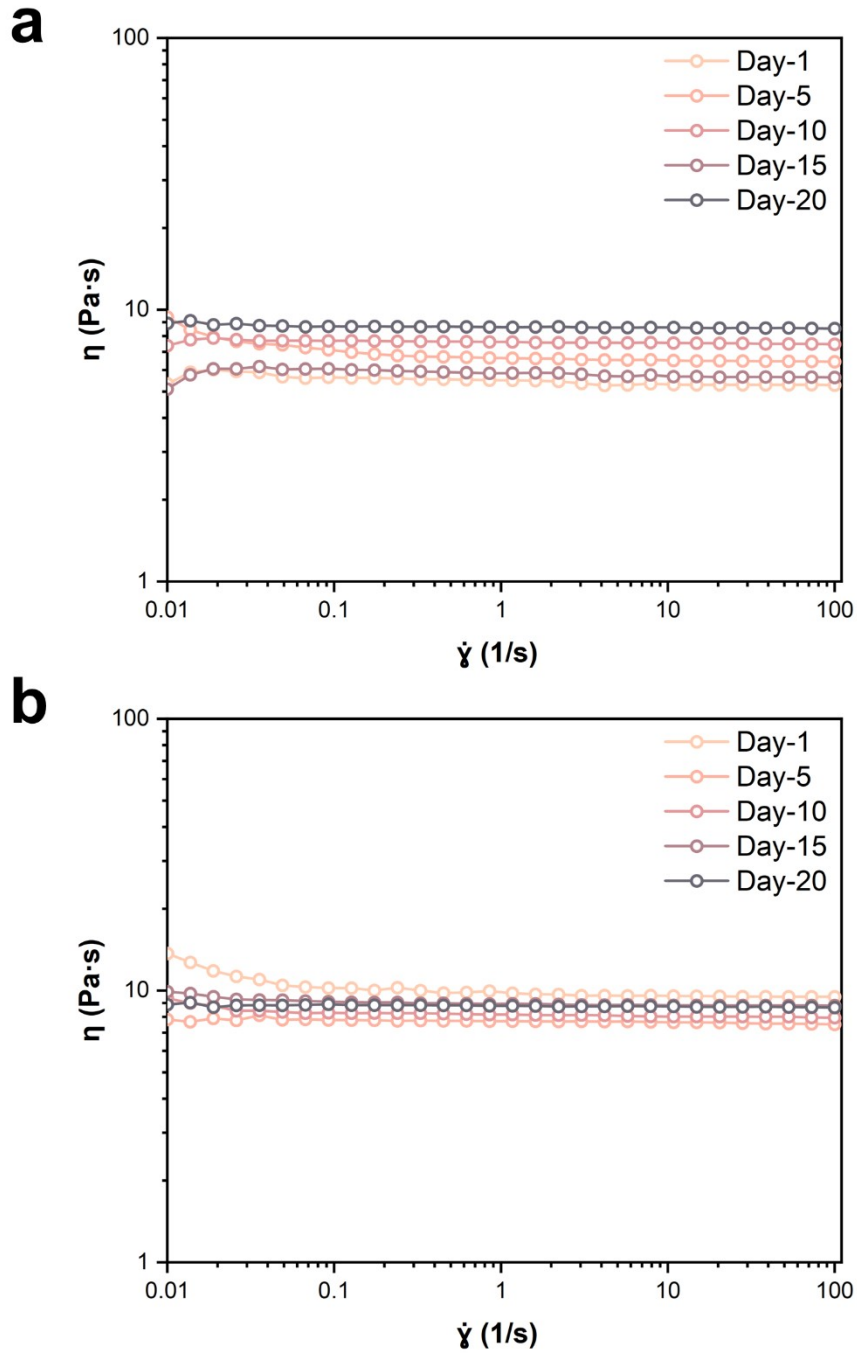

98

99 **Fig. S10.** (a) Viscosity curves of PT-ABVN formulation for different days at  $10^\circ$

100 storage. (b) Viscosity curves of PT-ABVN formulation for different days at  $10^\circ$

101 storage.

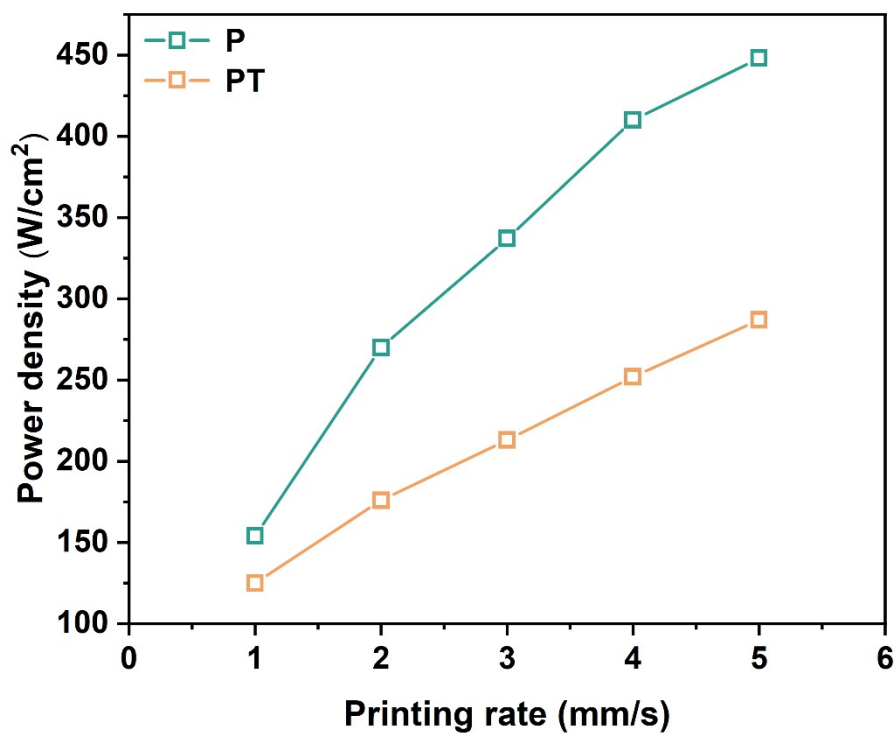

102

103 **Fig. S11.** Minimum laser power density for successful cantilever printing via different  
 104 system inks at varying rates

105

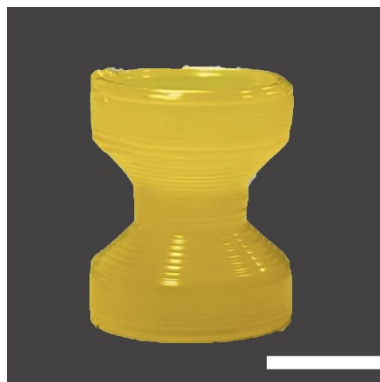

106

107 **Fig. S12.** The columnar structure with different inclination angles printed by PTSC.  
 108 The print rate is 2 mm/s, and the power density of NIR laser is 200 W/cm<sup>2</sup>. The length  
 109 of the scale bar in the figure is 1 cm.
